# Supplementary material for: Whole-Genome Sequencing of Retinoblastoma Reveals the Diversity of Rearrangements Disrupting RB1 and Uncovers a Treatment-Related Mutational Signature
Source: MDPI journal article supplement (doi:10.3390/cancers13040754), 2021-02-11
Supplement: s1 [file s1]

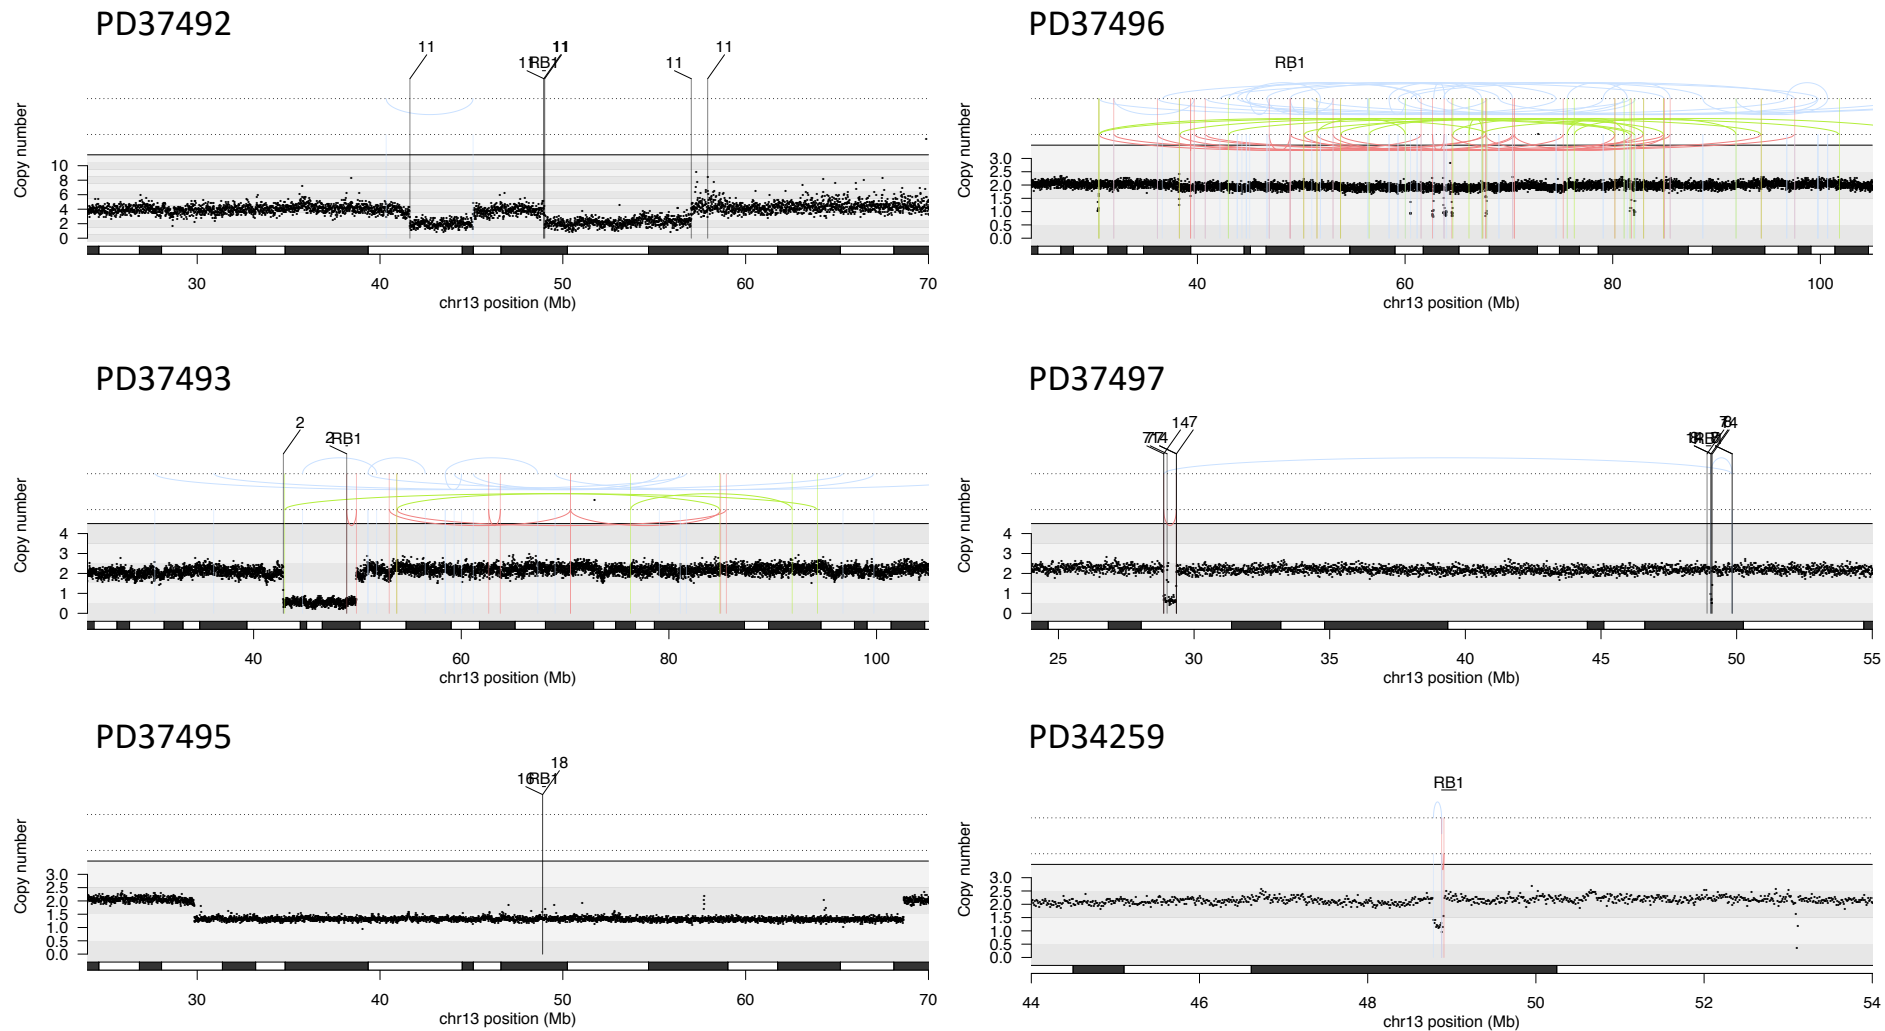

### Supplementary Figure 1: Examples of structural rearrangements disrupting *RB1*

Somatic copy number estimates (black dots, Y-axis) are plotted against genomic coordinates of chromosome 13 encompassing the *RB1* locus (X-axis). Structural rearrangement types coloured blue for inversions, red for deletions, green for tandem duplication and black for translocations. Chromosome numbering of translocation partners are shown above the plots.
